# Supplementary material for: xenoGI: reconstructing the history of genomic island insertions in clades of closely related bacteria
Source: PubMed Central journal article supplement (PMC5799925; doi:10.1186/s12859-018-2038-0), 2018-02-05

### User time

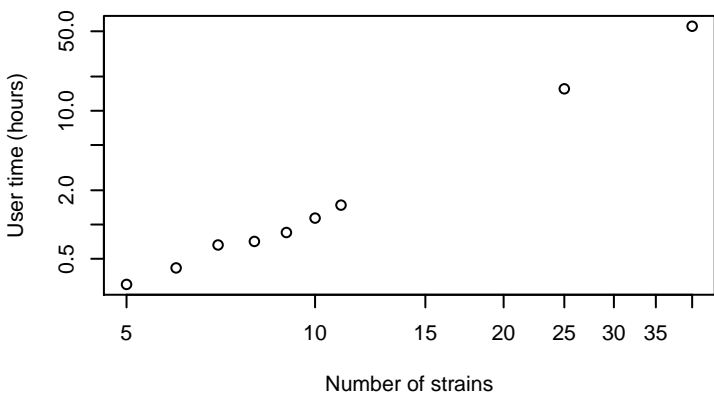

### Wall clock time

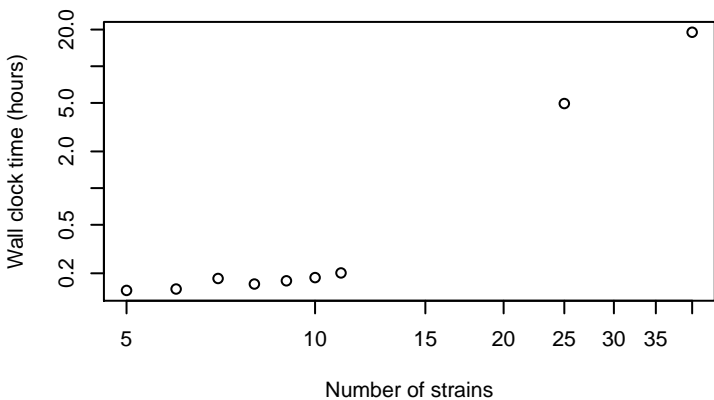

### RAM usage with 50 threads

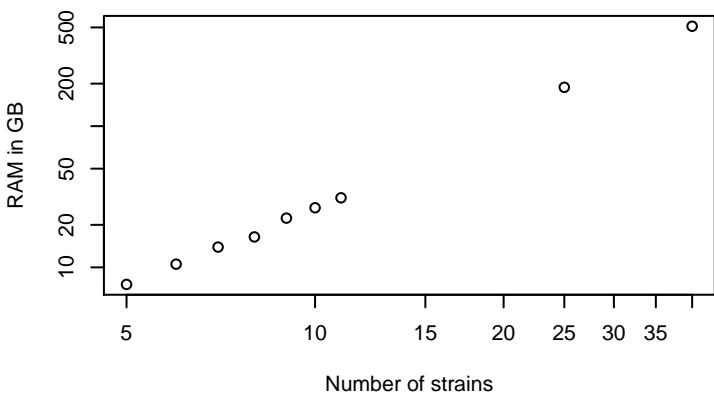

Supplement: 12859_2018_2038_MOESM3_ESM.pdf [file 12859_2018_2038_MOESM3_ESM.pdf]
